# Supplementary material for: Cutoff Points of Waist Circumference for Predicting Incident Non-Alcoholic Fatty Liver Disease in Middle-Aged and Older Korean Adults
Source: MDPI journal article supplement (doi:10.3390/nu14142994), 2022-07-21
Supplement: s1 [file s1]

## Supplementary Materials

**Table S1. Baseline characteristic of the study population according to incident NAFLD.**

| Variables                              | Total (n = 5400) | No incident NAFLD<br>(n = 3044) | incident NAFLD<br>(n = 2356) | p-value |
|----------------------------------------|------------------|---------------------------------|------------------------------|---------|
| Age, years                             | 51.7 ± 8.8       | 51.4 ± 9.0                      | 52.0 ± 8.5                   | 0.007   |
| WC, cm                                 | 80.0 ± 8.1       | 77.6 ± 7.7                      | 83.1 ± 7.4                   | <0.001  |
| Body fat, %                            | 26.3 ± 7.2       | 25.0 ± 7.1                      | 28.0 ± 7.0                   | <0.001  |
| BMI, kg/m <sup>2</sup>                 | 23.9 ± 2.9       | 23.0 ± 2.7                      | 24.9 ± 2.7                   | <0.001  |
| Total muscle mass, kg                  | 42.0 ± 7.6       | 41.4 ± 7.3                      | 42.9 ± 7.8                   | <0.001  |
| Height-adjusted TMM, kg/m <sup>2</sup> | 16.5 ± 1.7       | 16.2 ± 1.6                      | 16.8 ± 1.6                   | <0.001  |
| BMI-adjusted TMM, m <sup>2</sup>       | 1.8 ± 0.3        | 1.8 ± 0.3                       | 1.7 ± 0.3                    | <0.001  |
| Body weight, kg                        | 60.5 ± 9.1       | 58.5 ± 8.6                      | 63.1 ± 9.0                   | <0.001  |
| Smoking status, n (%)                  |                  |                                 |                              | 0.930   |
| Non-smoker                             | 3561 (66.8)      | 2019 (67.1)                     | 1542 (66.4)                  |         |
| Ex-smoker                              | 683 (12.8)       | 380 (12.6)                      | 303 (13.0)                   |         |
| Intermittent smoker                    | 114 (2.1)        | 65 (2.2)                        | 49 (2.1)                     |         |
| Every day smoker                       | 973 (18.3)       | 543 (18.1)                      | 430 (18.5)                   |         |
| Physical activity, n (%)               |                  |                                 |                              | 0.290   |
| Low (<7.5 METS-h/wk)                   | 392 (7.6)        | 222 (7.6)                       | 170 (7.5)                    |         |
| Moderate (7.5–30 METS-h/wk)            | 3148 (60.6)      | 1802 (61.5)                     | 1346 (59.5)                  |         |
| High (>30 METS-h/wk)                   | 1651 (31.8)      | 906 (30.9)                      | 745 (33.0)                   |         |
| Alcohol drinking, yes, n (%)           | 2305 (43.0)      | 1282 (42.5)                     | 1023 (43.8)                  | 0.335   |
| Total energy intake, kcal/day          | 1937.1 ± 706.1   | 1930.2 ± 691.2                  | 1946.0 ± 725.0               | 0.425   |
| MBP, mmHg                              | 94.0 ± 12.6      | 92.1 ± 12.5                     | 96.3 ± 12.4                  | <0.001  |
| FPG, mg/dl                             | 82.6 ± 11.8      | 81.0 ± 8.4                      | 84.6 ± 14.9                  | <0.001  |
| TC, mg/dl                              | 188.0 ± 33.6     | 185.0 ± 32.7                    | 191.7 ± 34.3                 | <0.001  |
| CRP                                    | 0.23 ± 0.60      | 0.2 ± 0.5                       | 0.3 ± 0.7                    | 0.001   |
| ALT                                    | 22.1 ± 8.8       | 20.8 ± 8.0                      | 23.8 ± 9.5                   | <0.001  |
| AST                                    | 26.4 ± 6.9       | 26.1 ± 6.7                      | 26.8 ± 7.1                   | <0.001  |

Data are presented as mean ± standard deviations for continuous variables and number (%) for categorical variables. Abbreviations: WC, waist circumference; BMI, body mass index; TMM, total skeletal muscle mass; MBP, mean blood pressure; FPG, fasting plasma glucose; TC, total cholesterol; CRP, C reactive protein; ALT, alanine aminotransferase; AST, aspartate aminotransferase; NAFLD, non-alcoholic fatty liver disease

**Table S2. Harrell's concordance index and 95% confidence interval for incident non-alcoholic fatty liver diseases according to five body composition indices.**

|              | Variables                 | Harrell's concordance index (95% CI) | Pairwise comparison <i>p</i> -value |           |           |                     |           |
|--------------|---------------------------|--------------------------------------|-------------------------------------|-----------|-----------|---------------------|-----------|
|              |                           |                                      | WC                                  | Body fat  | BMI       | TMM/Ht <sup>2</sup> | TMM/BMI   |
| <b>Total</b> | <b>WC</b>                 | 0.68 (0.67–0.69)                     | reference                           |           |           |                     |           |
|              | <b>Body fat</b>           | 0.59 (0.58–0.60)                     | <0.001                              | reference |           |                     |           |
|              | <b>BMI</b>                | 0.66 (0.65–0.68)                     | 0.001                               | <0.001    | reference |                     |           |
|              | <b>TMM/Ht<sup>2</sup></b> | 0.60 (0.59–0.61)                     | <0.001                              | 0.616     | <0.001    | reference           |           |
|              | <b>TMM/BMI</b>            | 0.56 (0.55–0.57)                     | <0.001                              | <0.001    | <0.001    | 0.001               | reference |
| <b>Men</b>   | <b>WC</b>                 | 0.68 (0.66–0.70)                     | reference                           |           |           |                     |           |
|              | <b>Body fat</b>           | 0.64 (0.62–0.66)                     | <0.001                              | reference |           |                     |           |
|              | <b>BMI</b>                | 0.66 (0.64–0.68)                     | 0.001                               | 0.033     | reference |                     |           |
|              | <b>TMM/Ht<sup>2</sup></b> | 0.61 (0.59–0.63)                     | <0.001                              | 0.007     | <0.001    | reference           |           |
|              | <b>TMM/BMI</b>            | 0.58 (0.56–0.60)                     | <0.001                              | <0.001    | <0.001    | 0.033               | reference |
| <b>Women</b> | <b>WC</b>                 | 0.69 (0.67–0.70)                     | reference                           |           |           |                     |           |
|              | <b>Body fat</b>           | 0.64 (0.63–0.66)                     | <0.001                              | reference |           |                     |           |
|              | <b>BMI</b>                | 0.67 (0.66–0.68)                     | 0.001                               | <0.001    | reference |                     |           |
|              | <b>TMM/Ht<sup>2</sup></b> | 0.62 (0.61–0.64)                     | <0.001                              | 0.070     | <0.001    | reference           |           |
|              | <b>TMM/BMI</b>            | 0.62 (0.60–0.63)                     | <0.001                              | <0.001    | <0.001    | 0.702               | reference |

Abbreviations: WC, waist circumference; BMI, body mass index; TMM, total skeletal muscle mass; CI, confidence interval.
